# Supplementary material
Source: Elsevier journal article supplement (https://www.sciencedirect.com/science/article/pii/S0213911122001285)
Supplement: mmc1 [file S0213911122001285:mmc1.doc]

| Apéndice  Unidad temática: afectación/impacto en la calidad de vida de los/las pacientes | |
| --- | --- |
|  | |
| Afectación importante que la COVID persistente ha tenido en su calidad de vida y su entorno social  Imposibilidad de recuperar su actividad laboral previa  Algunas personas expresan cómo esta situación está afectando también a su entorno social. En consecuencia, han visto disminuidas o modificadas sus relaciones sociales y familiares | Ángela: *«…el simple hecho de ducharme para mí es un suplicio, salgo y me falta el aire, me noto cansada y así es mi día a día…»*  Julen: «*…he vuelto a trabajar dos veces, en abril cogí la COVID, estuve de baja hasta julio, después he trabajado hasta diciembre, cogí la baja el 7 de enero y he empezado a trabajar hace dos días»*  Beñat: *«Lo que más me preocupa es ese malestar post esfuerzo y que no pueda incorporarme a mi vida, al final tienes unos objetivos. A nivel laboral has estado muchos años para llegar a una situación trabajando duro y de repente se para todo… Mi mayor miedo es que no pueda incorporarme, ni siquiera de una manera parcial, sentirte integrado en la sociedad...»*  Aitor: *«Las relaciones sociales al final las he reducido muchísimo, se nota muchísimo, es físicamente un cansancio que no se acaba de ir, no puedo hacer el deporte que hacía antes…»* |
|  |  |
| Unidad temática: detección de mejoras en la asistencia sanitaria | |
| Excelente atención en el momento agudo de la enfermedad  Necesidad de sensibilización y formación de profesionales  Falta de reconocimiento de la enfermedad  Necesidad de una atención integral y de una continuidad en el seguimiento de la evolución clínica  Unidad temática: aspectos que reconfortan | Julen: *«…el trato y los profesionales en Osakidetza son buenísimos, lo que mejoraría es la demora, es la única pega»*  Aitor: *«Algunos me han tratado con preocupación, con empatía y otros no han empatizado nada. No he notado que con el tiempo que ha pasado, sino que depende del profesional… Ha habido profesionales que han tratado esto como algo pasajero, casi como si fuera estrés, algo psicológico... En esos casos… pues me he tenido que ir a la privada. Y luego ha habido otros profesionales que sí me han comprendido»*  Janire: *«Como no hay una etiqueta COVID persistente… no se ha reconocido la enfermedad.... Esto es encefalomielitis miálgica, pues no, porque tengo brotes dérmicos en la fase aguda de la COVID, que me han hecho biopsia, tengo la dermatología de la fase aguda del COVID a los 17 meses»*  Haizea: *«Es súper importante que habiliten una consulta especializada, que no nos mareen con una especialidad y otra. Que elaboren un protocolo que defina qué es lo que tenemos y por dónde tenemos que empezar a transitar y te habiliten las rehabilitaciones»*  Soco: *«Creo que la sanidad del País Vasco es de lo mejor que tenemos... Que no sabemos lo que tenemos. Han creado un grupo de personas afectadas por el COVID, que va un poco dirigido psicológicamente… unos miércoles son técnicas de relajación y otro miércoles es una psicóloga»*  Janire: *«Ya te voy a sacar sangre y yo y se la vamos a mandar a Xxx, y ya verás cómo tienes tú las citoquinas por las nubes… empezar a buscar tratamiento, eso es lo que hace falta…»* |
